# Supplementary material
Source: PubMed Central journal article supplement (PMC2711334)

Biophysical Journal, Volume 97

**Supporting Material**

**Roles of boundary conditions in DNA simulations: Analysis of ion distributions with the finite-difference Poisson-Boltzmann method**

Xiang Ye, Qin Cai, Wei Yang, and Ray Luo

# **Roles of boundary conditions in DNA simulations: Analysis of ion distributions with the finite-difference Poisson-Boltzmann method**

**Xiang Ye,<sup>1</sup> Qin Cai,<sup>1,2</sup> Wei Yang,<sup>3,4,5</sup> and Ray Luo<sup>1,2\*</sup>**

*1. Department of Molecular Biology and Biochemistry  
University of California, Irvine, CA 92697*

*2. Department of Biomedical Engineering  
University of California, Irvine, CA 92697*

*3. Department of Chemistry and Biochemistry  
Florida State University, Tallahassee, FL 32306*

*4. Institute of Molecular Biophysics  
Florida State University, Tallahassee, FL 32306*

*5. College of Life Sciences  
Nankai University, Tianjin 300071, P. R. China*

## **Supplementary Materials**

**Fig. S-1.** Continuum ion distributions in the x-z plane for a t-RNA (310D). (a), (b), (c) are for the PBC simulations in the small, medium, and large boxes, respectively. (d) is for the NPBC simulation. See Fig. 1 for more details.

**Fig. S-2.** Continuum ion distributions in the x-z plane for a DNA-binding protein (1TSR). (a), (b), (c) are for the PBC simulations in the small, medium, and large boxes, respectively. (d) is for the NPBC simulation. See Fig. 1 for more details.

**Fig. S-3.** Continuum ion distributions in the x-z planes of 1BNA and 1TSR for the medium-sized box. (a) is for 1BNA with nonlinear FDPB in NPBC; (b) is for 1BNA with nonlinear FDPB in PBC; (c) is for 1TSR with nonlinear FDPB in NPBC; (d) is for 1TSR with nonlinear FDPB in PBC. See Fig. 1 for more details.

**Fig. S-4.** Correlation between relative electrostatic energies from linear FDPB and nonlinear FDPB for eight selected snapshots in one MC simulation trajectory of 1BNA.

Figure S-1

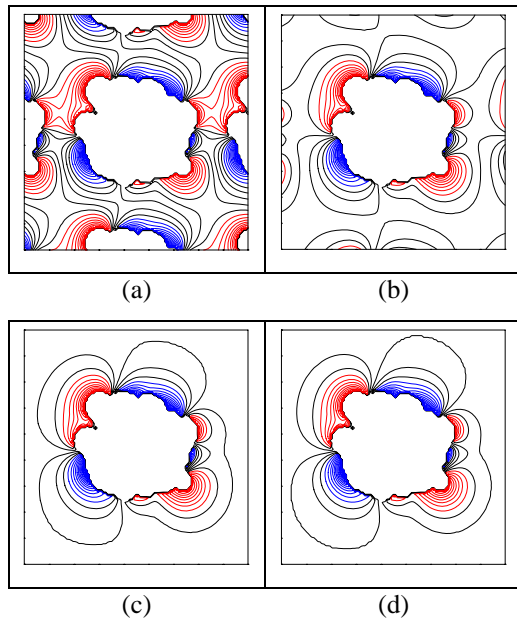

Figure S-2

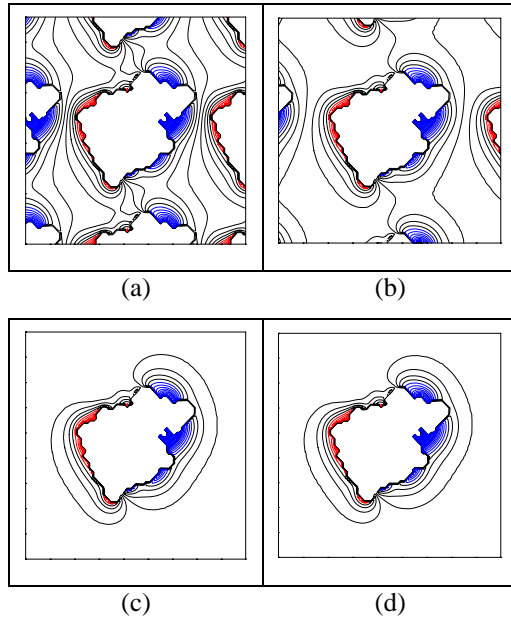

Figure S-3

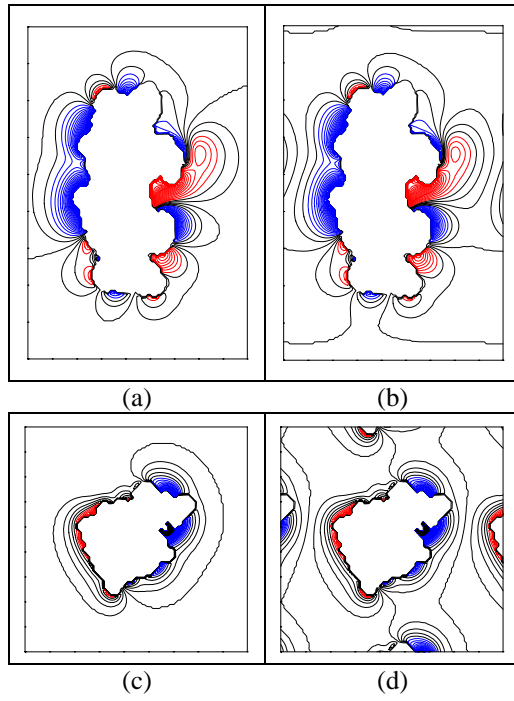

Figure S-4

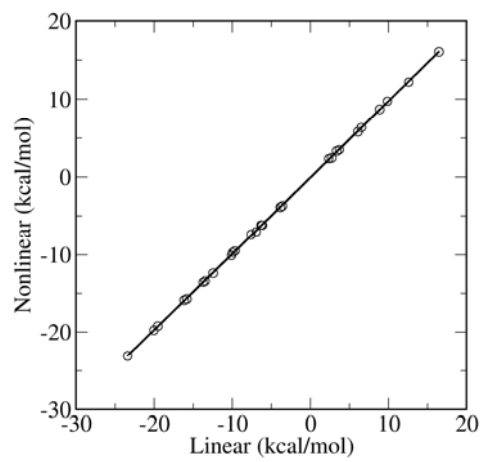

Supplement: mmc1.pdf [file mmc1.pdf]
